# Supplementary material
Source: Springer Nature journal article supplement (https://www.springermedizin.de/resource/supplementary/12874_2004_101_MOESM1_ESM.pdf/9433768)
Supplement: MOESM1 [file 9433768]

|                                                                                                                                                                                          |                                                                                                                                                                          | The Sample size ranges from 8 to 15.                                                                                                                                         | The Sample size ranges from 16 to 35.                                                                                                                          | The Sample size ranges from 36 to 72.                                                                                            | The Sample size ranges from 73 to 100 and beyond.                             |
|------------------------------------------------------------------------------------------------------------------------------------------------------------------------------------------|--------------------------------------------------------------------------------------------------------------------------------------------------------------------------|------------------------------------------------------------------------------------------------------------------------------------------------------------------------------|----------------------------------------------------------------------------------------------------------------------------------------------------------------|----------------------------------------------------------------------------------------------------------------------------------|-------------------------------------------------------------------------------|
| <b>Approximation of the mean.</b> Each number in this table represents the average relative error of estimating the sample mean in 200 samples from a normal distribution.               | <b>LEGEND:</b><br>The median approximation is represented by black crosses, Formula (4) is represented by blue boxes, and Formula (5) by red diamonds.                   |                                                                                                                                                                              |                                                                                                                                                                |                                                                                                                                  |                                                                               |
|                                                                                                                                                                                          | <b>Median</b>                                                                                                                                                            | 5.29 %                                                                                                                                                                       | 3.96 %                                                                                                                                                         | 2.78 %                                                                                                                           | 2.17 %                                                                        |
|                                                                                                                                                                                          | <b>Formula (4)</b>                                                                                                                                                       | 3.63 %                                                                                                                                                                       | 3.87 %                                                                                                                                                         | 3.83 %                                                                                                                           | 3.79 %                                                                        |
|                                                                                                                                                                                          | <b>Formula (5)</b>                                                                                                                                                       | 3.39 %                                                                                                                                                                       | 3.73 %                                                                                                                                                         | 3.76 %                                                                                                                           | 3.75 %                                                                        |
|                                                                                                                                                                                          | <b>Conclusion</b>                                                                                                                                                        | Formula (5) is within 4% of the actual sample mean and is performing the best. Formula (4) is almost indistinguishable from Formula (5), and the median is very close behind | All three of these formulas are very close (the scale is within 4%), but the median approximation starts being the best when the sample size reaches about 29. | The median continues to be the best estimator, separating itself from the other two formulas for the sample sizes in this range. | The averages stabilize and remain fairly steady as the sample size increases. |
| <b>Approximation of the standard deviation.</b> Each number in this table represents the average relative error of estimating the sample mean in 200 samples from a normal distribution. | <b>LEGEND:</b><br>The Formula (12) is shown using black crosses, Formula (16) is represented by blue boxes; Range/4 by the green circles, and Range/6 by brown diamonds. |                                                                                                                                                                              |                                                                                                                                                                |                                                                                                                                  |                                                                               |
|                                                                                                                                                                                          | <b>Formula (12)</b>                                                                                                                                                      | 11.09 %                                                                                                                                                                      | 14.78 %                                                                                                                                                        | 21.96 %                                                                                                                          | 28.25 %                                                                       |
|                                                                                                                                                                                          | <b>Formula (16)</b>                                                                                                                                                      | 8.77 %                                                                                                                                                                       | 18.16 %                                                                                                                                                        | 33.36 %                                                                                                                          | 43.36 %                                                                       |
|                                                                                                                                                                                          | <b>Range/4</b>                                                                                                                                                           | 15.10 %                                                                                                                                                                      | 9.36 %                                                                                                                                                         | 16.01 %                                                                                                                          | 23.95 %                                                                       |
|                                                                                                                                                                                          | <b>Range/6</b>                                                                                                                                                           | 42.95 %                                                                                                                                                                      | 32.62 %                                                                                                                                                        | 23.29 %                                                                                                                          | 17.69 %                                                                       |
| <b>Conclusion</b>                                                                                                                                                                        | Formula (16) is the best estimator of the standard deviation in this range of sample sizes.                                                                              | The Range/4 formula takes over as the best estimate for the variance                                                                                                         | The Range/4 formula is slowly losing its advantage, and the Range/6 formula is closing in.                                                                     | The Range/6 takes over the lead in accuracy, and keeps it as the sample sizes increase.                                          |                                                                               |

TABLE 1: Normal Distribution with parameters  $\mu = 50$  and  $\sigma = 17$ .
